# Supplementary material for: Association of Obesity With Prescription Opioids for Painful Conditions in Patients Seeking Primary Care in the US
Source: PubMed Central journal article supplement (PMC7118518; doi:10.1001/jamanetworkopen.2020.2012), 2020-04-02
Supplement: jamanetwopen-3-e202012-s001.pdf [file jamanetwopen-3-e202012-s001.pdf]

## Supplementary Online Content

Stokes A, Lundberg DJ, Sheridan B, et al. Association of obesity with prescription opioids for painful conditions in patients seeking primary care in the US. *JAMA Netw Open*. 2020;3(4):e202012. doi:10.1001/jamanetworkopen.2020.2012

**eTable 1.** Negative Binomial Regression of BMI and Any Prescription Opioids (n=565,930)

**eTable 2.** Negative Binomial Regression of BMI and Any Prescription Opioids Using Multiply Imputed Data (n=632,535)

**eFigure 1.** Sample Inclusion/Exclusion Criteria

**eFigure 2.** Percent Recording a Pain Diagnosis Alone or in Combination With a Second Diagnosis Among Patients With Obesity Aged 35-64 With 1+ Prescription Opioid and Diagnosis, athenahealth Network, 2015-2017 (n=44,747)

**eFigure 3.** Relative Risk of Prescription Opioids by Obesity (Obese vs Normal Weight) in Subgroups Stratified by Sociodemographic Characteristics (n=555,444)

**eTable 3.** Opioid Analgesic Medications Identified as Prescription Opioids

**eTable 4.** ICD-9 Typology to Identify Pain Diagnosis Claims

**eTable 5.** ICD-10 Crosswalk From ICD-9 Typology to Identify Pain Diagnosis Claims

This supplementary material has been provided by the authors to give readers additional information about their work.

**eTable 1.** Negative binomial regression of BMI and any prescription opioids (n=565,930)

|                                           | Relative Risk | 95% CI |        | P-Value |
|-------------------------------------------|---------------|--------|--------|---------|
| <b>Body Mass Index (kg/m<sup>2</sup>)</b> |               |        |        |         |
| Underweight (18.5 - 19.9)                 | 1.15          | 1.10   | , 1.21 | <0.001  |
| Normal Weight (20 - 24.9)                 | ref           | -      |        | -       |
| Overweight (25 - 29.9)                    | 1.08          | 1.06   | , 1.10 | <0.001  |
| Obese I (30 - 34.9)                       | 1.24          | 1.22   | , 1.26 | <0.001  |
| Obese II (35 - 39.9)                      | 1.33          | 1.30   | , 1.36 | <0.001  |
| Obese III (40 - 49.9)                     | 1.48          | 1.45   | , 1.51 | <0.001  |
| Obese IV+ (50 - 80)                       | 1.71          | 1.65   | , 1.77 | <0.001  |
| <b>Sex</b>                                |               |        |        |         |
| Male                                      | ref           | -      |        | -       |
| Female                                    | 1.03          | 1.02   | , 1.05 | <0.001  |
| <b>Age</b>                                |               |        |        |         |
| 35-39                                     | ref           | -      |        | -       |
| 40-44                                     | 1.06          | 1.03   | , 1.09 | <0.001  |
| 45-49                                     | 1.16          | 1.13   | , 1.19 | <0.001  |
| 50-54                                     | 1.25          | 1.22   | , 1.28 | <0.001  |
| 55-59                                     | 1.28          | 1.25   | , 1.31 | <0.001  |
| 60-64                                     | 1.17          | 1.15   | , 1.20 | <0.001  |
| <b>Race/Ethnicity</b>                     |               |        |        |         |
| Non-Hispanic White                        | ref           | -      |        | -       |
| Non-Hispanic Black                        | 0.91          | 0.89   | , 0.92 | <0.001  |
| Hispanic                                  | 0.88          | 0.86   | , 0.90 | <0.001  |
| Other                                     | 0.71          | 0.68   | , 0.75 | <0.001  |
| <b>Urban/Rural</b>                        |               |        |        |         |
| Metro                                     | ref           | -      |        | -       |
| Metro-Adjacent                            | 1.27          | 1.25   | , 1.29 | <0.001  |
| Rural                                     | 1.09          | 1.07   | , 1.12 | <0.001  |
| <b>Census Region</b>                      |               |        |        |         |
| Northeast                                 | ref           | -      |        | -       |
| Midwest                                   | 1.79          | 1.75   | , 1.83 | <0.001  |
| South                                     | 1.88          | 1.85   | , 1.91 | <0.001  |
| West                                      | 1.81          | 1.77   | , 1.85 | <0.001  |
| <b>Health Insurance</b>                   |               |        |        |         |
| Commercial                                | ref           | -      |        | -       |
| Medicaid                                  | 2.15          | 2.11   | , 2.19 | <0.001  |
| Medicare                                  | 2.40          | 2.36   | , 2.43 | <0.001  |
| Other                                     | 1.62          | 1.58   | , 1.66 | <0.001  |

**eTable 2.** Negative binomial regression of BMI and any prescription opioids using multiply imputed data (n=632,535)

|                                           | Relative Risk | 95% CI |        | P-Value |
|-------------------------------------------|---------------|--------|--------|---------|
| <b>Body Mass Index (kg/m<sup>2</sup>)</b> |               |        |        |         |
| Underweight (18.5 - 19.9)                 | 1.14          | 1.09   | , 1.19 | <0.001  |
| Normal Weight (20 - 24.9)                 | ref           | -      |        | -       |
| Overweight (25 - 29.9)                    | 1.09          | 1.07   | , 1.11 | <0.001  |
| Obese I (30 - 34.9)                       | 1.25          | 1.23   | , 1.27 | <0.001  |
| Obese II (35 - 39.9)                      | 1.35          | 1.32   | , 1.38 | <0.001  |
| Obese III (40 - 49.9)                     | 1.51          | 1.47   | , 1.54 | <0.001  |
| Obese IV+ (50 - 80)                       | 1.74          | 1.68   | , 1.80 | <0.001  |
| <b>Sex</b>                                |               |        |        |         |
| Male                                      | ref           | -      |        | -       |
| Female                                    | 1.03          | 1.02   | , 1.04 | <0.001  |
| <b>Age</b>                                |               |        |        |         |
| 35-39                                     | ref           | -      |        | -       |
| 40-44                                     |               |        |        |         |
| 45-49                                     | 1.08          | 1.05   | , 1.11 | <0.001  |
| 50-54                                     | 1.19          | 1.16   | , 1.22 | <0.001  |
| 55-59                                     | 1.29          | 1.26   | , 1.33 | <0.001  |
| 60-64                                     | 1.32          | 1.29   | , 1.35 | <0.001  |
| <b>Race/Ethnicity</b>                     |               |        |        |         |
| Non-Hispanic White                        | ref           | -      |        | -       |
| Non-Hispanic Black                        | 0.91          | 0.90   | , 0.93 | <0.001  |
| Hispanic                                  | 0.87          | 0.85   | , 0.89 | <0.001  |
| Other                                     | 0.71          | 0.68   | , 0.74 | <0.001  |
| <b>Urban/Rural</b>                        |               |        |        |         |
| Metro                                     | ref           | -      |        | -       |
| Metro-Adjacent                            | 1.31          | 1.29   | , 1.33 | <0.001  |
| Rural                                     | 1.14          | 1.11   | , 1.16 | <0.001  |
| <b>Census Region</b>                      |               |        |        |         |
| Northeast                                 | ref           | -      |        | -       |
| Midwest                                   | 1.78          | 1.75   | , 1.82 | <0.001  |
| South                                     | 1.81          | 1.78   | , 1.84 | <0.001  |
| West                                      | 1.76          | 1.72   | , 1.80 | <0.001  |
| <b>Health Insurance</b>                   |               |        |        |         |
| Commercial                                | ref           | -      |        | -       |
| Medicaid                                  | 2.21          | 2.17   | , 2.25 | <0.001  |
| Medicare                                  | 2.47          | 2.43   | , 2.50 | <0.001  |
| Other                                     | 1.67          | 1.63   | , 1.71 | <0.001  |

a. Multiple imputation by chained equations was used to impute missing values of race/ethnicity and urbanicity.

b. Supplemental Table 1 presents the same regression in a sample where observations with missing values were excluded.

**eFigure 1.** Sample inclusion/exclusion criteria

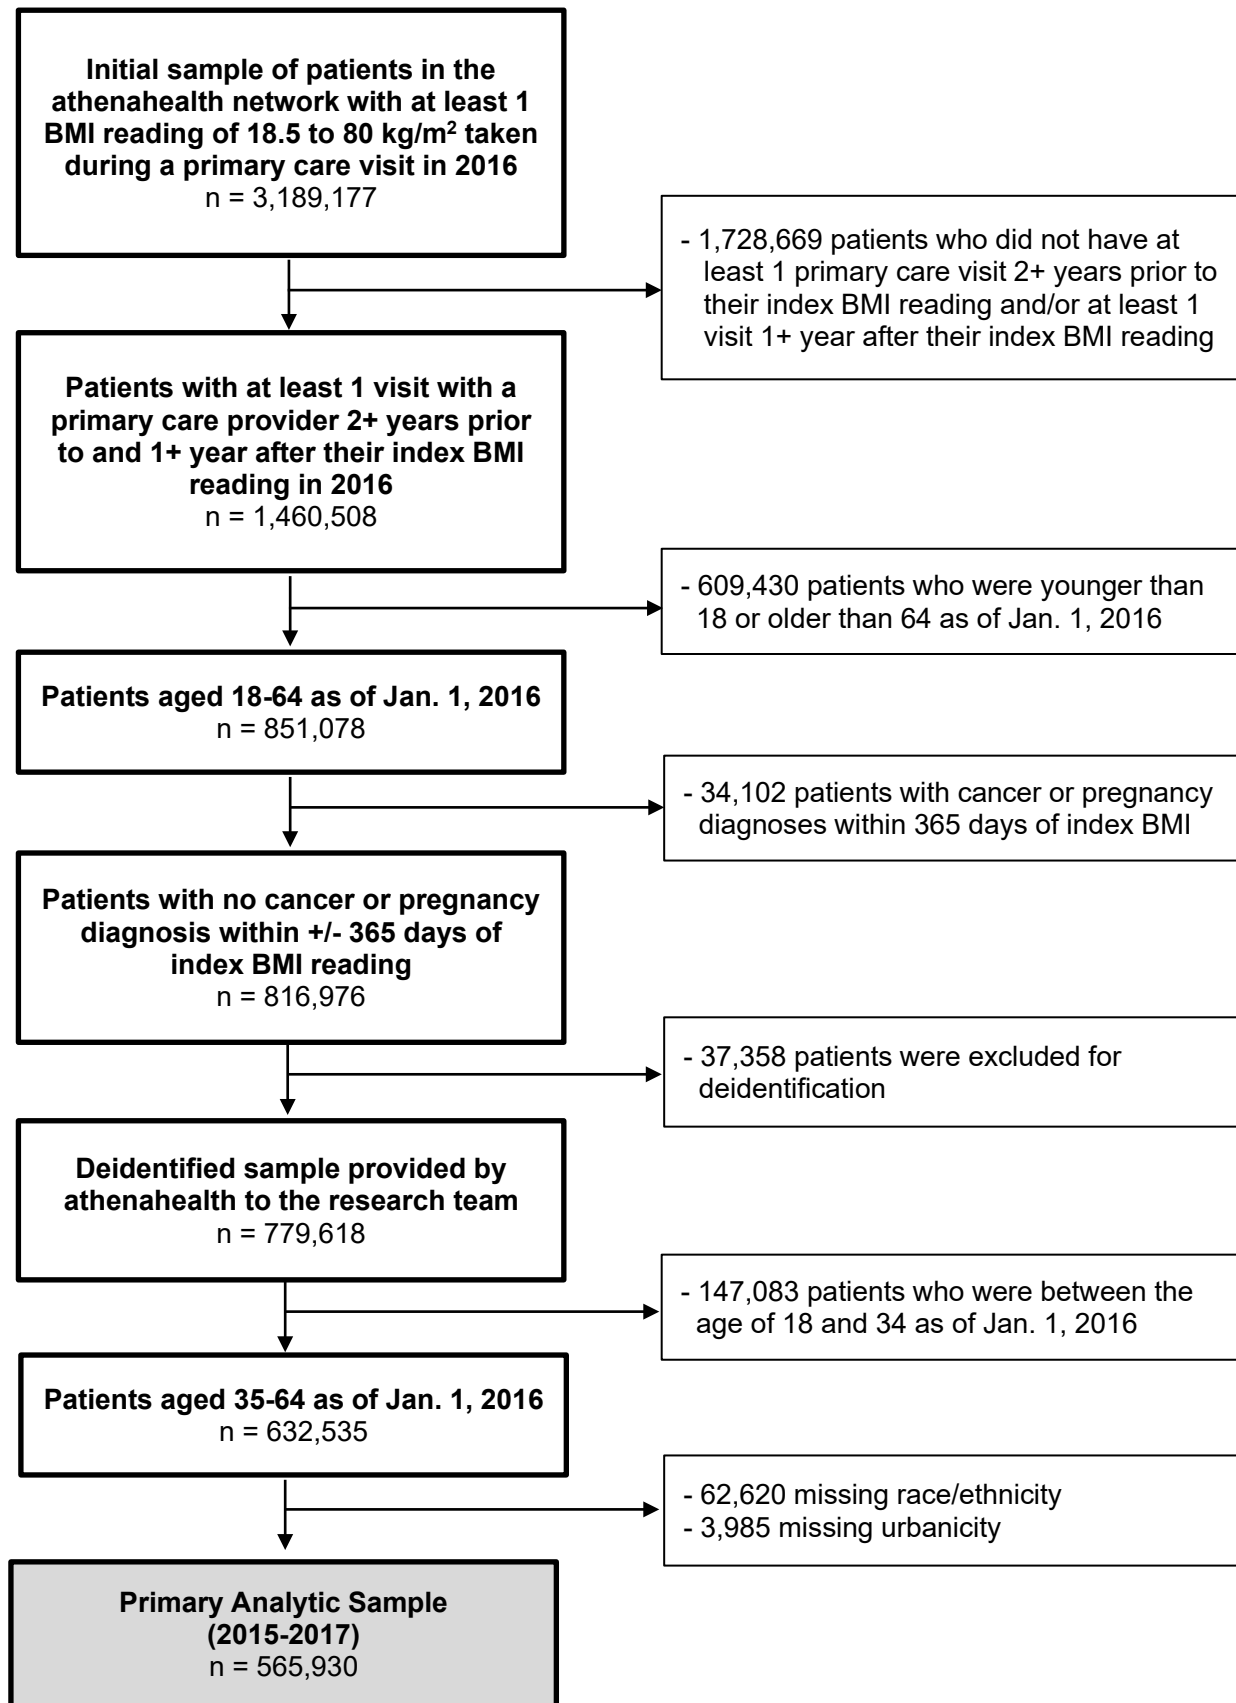

**eFigure 2.** Percent recording a pain diagnosis alone or in combination with a second diagnosis among patients with obesity aged 35-64 with 1+ prescription opioid and diagnosis, athenahealth network, 2015-2017 (n=44,747)<sup>a,b,c,d</sup>

| Other back disorders | Other joint disorders | Osteoarthritis | Chronic pain | Myopathy | Degeneration of disc | Backache | Radiculitis | Headache syndromes | Other digestive diseases | Cervicalgia | Peripheral nerve disorder | Pain in limb | Other injury | Displacement of disc |                           |
|----------------------|-----------------------|----------------|--------------|----------|----------------------|----------|-------------|--------------------|--------------------------|-------------|---------------------------|--------------|--------------|----------------------|---------------------------|
| 8.6%                 | 3.3%                  | 1.8%           | 2.1%         | 1.9%     | 2.0%                 | 0.48%    | 2.7%        | 0.65%              | 0.57%                    | 1.5%        | 0.97%                     | 0.63%        | 0.29%        | 1.1%                 | Other back disorders      |
|                      | 10.3%                 | 2.2%           | 1.13%        | 1.21%    | 0.89%                | 0.56%    | 0.86%       | 0.52%              | 0.48%                    | 0.97%       | 0.78%                     | 0.93%        | 0.43%        | 0.51%                | Other joint disorders     |
|                      |                       | 4.8%           | 0.71%        | 1.00%    | 0.58%                | 0.21%    | 0.71%       | 0.26%              | 0.19%                    | 0.29%       | 0.65%                     | 0.25%        | 0.10%        | 0.28%                | Osteoarthritis            |
|                      |                       |                | 2.9%         | 0.54%    | 0.70%                | 0.27%    | 0.85%       | 0.25%              | 0.20%                    | 0.51%       | 0.43%                     | 0.23%        | 0.08%        | 0.38%                | Chronic pain              |
|                      |                       |                |              | 1.1%     | 0.50%                | 0.17%    | 0.86%       | 0.36%              | 0.15%                    | 0.53%       | 0.46%                     | 0.18%        | 0.06%        | 0.32%                | Myopathy                  |
|                      |                       |                |              |          | 1.5%                 | 0.17%    | 0.81%       | 0.19%              | 0.08%                    | 0.49%       | 0.27%                     | 0.14%        | 0.06%        | 0.51%                | Degeneration of disc      |
|                      |                       |                |              |          |                      | 2.9%     | 0.13%       | 0.17%              | 0.20%                    | 0.21%       | 0.14%                     | 0.12%        | 0.11%        | 0.08%                | Backache                  |
|                      |                       |                |              |          |                      |          | 1.1%        | 0.15%              | 0.07%                    | 0.41%       | 0.29%                     | 0.16%        | 0.06%        | 0.48%                | Radiculitis               |
|                      |                       |                |              |          |                      |          |             | 2.5%               | 0.22%                    | 0.42%       | 0.17%                     | 0.10%        | 0.10%        | 0.13%                | Headache syndromes        |
|                      |                       |                |              |          |                      |          |             |                    | 2.8%                     | 0.08%       | 0.11%                     | 0.08%        | 0.04%        | 0.06%                | Other digestive diseases  |
|                      |                       |                |              |          |                      |          |             |                    |                          | 1.3%        | 0.27%                     | 0.22%        | 0.10%        | 0.25%                | Cervicalgia               |
|                      |                       |                |              |          |                      |          |             |                    |                          |             | 1.2%                      | 0.23%        | 0.07%        | 0.22%                | Peripheral nerve disorder |
|                      |                       |                |              |          |                      |          |             |                    |                          |             |                           | 1.8%         | 0.19%        | 0.09%                | Pain in limb              |
|                      |                       |                |              |          |                      |          |             |                    |                          |             |                           |              | 1.9%         | 0.05%                | Other injury              |
|                      |                       |                |              |          |                      |          |             |                    |                          |             |                           |              |              | 1.0%                 | Displacement of disc      |

- a. Patients with obesity had a BMI above 30 kg/m<sup>2</sup>.
- b. Prevalence of each diagnosis or combination of diagnoses is unadjusted.
- c. 15.8% of patients with prescription opioids in the sample recorded no pain diagnosis and were excluded.
- d. See Appendix Tables 2 and 3 for ICD-9 and ICD-10 used to diagnose each pain condition.

**eFigure 3.** Relative risk of prescription opioids by obesity (obese vs. normal weight) in subgroups stratified by sociodemographic characteristics (n=555,444)

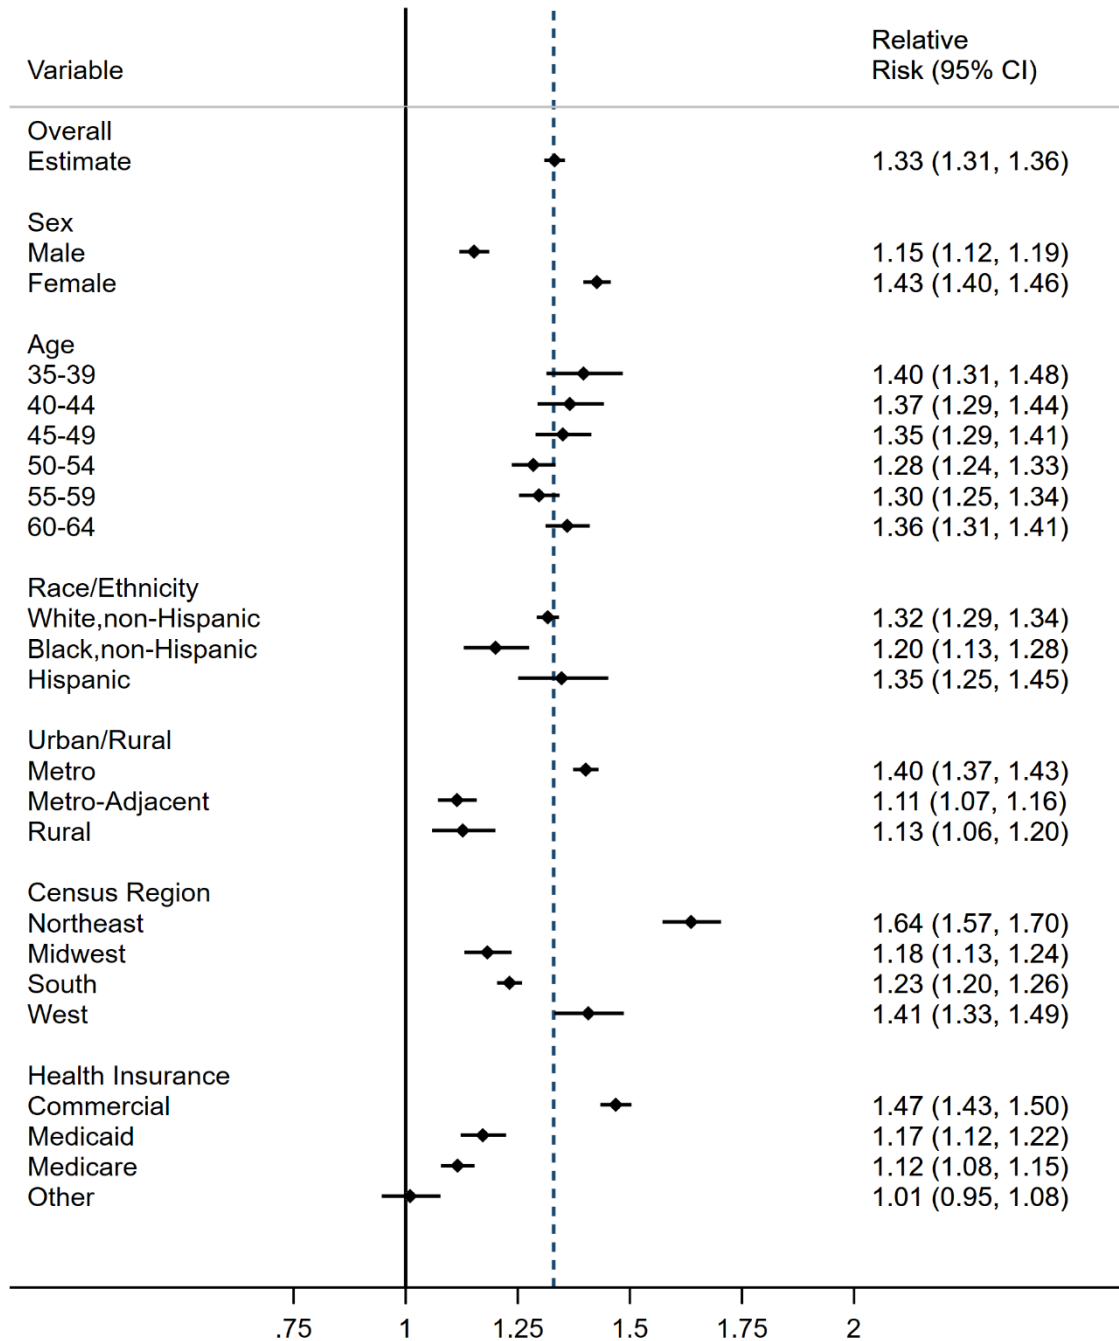

- Patients with obesity had BMI above 30 kg/m<sup>2</sup>. Patients with normal weight had BMI 20-24.9 kg/m<sup>2</sup>. Patients who were underweight (18.5 to 19.9 kg/m<sup>2</sup>) were excluded.
- Relative risks were calculated using a negative binomial regression of BMI and prescription opioid use, adjusting for all covariates – age, sex, race/ethnicity, region, urbanicity, and health insurance – except for the covariate used to stratify.
- Sample interpretation: female patients who were obese (30+ kg/m<sup>2</sup>) were 1.43 times more likely to receive prescription opioids than female patients with normal BMI (20-24.9 kg/m<sup>2</sup>). However, male patients who were obese were only 1.15 times more likely to receive prescription opioids than male patients with normal BMI.

**eTable 3.** Opioid analgesic medications identified as prescription opioids

| Medication category                                                                                                                          | Medication name                                            |
|----------------------------------------------------------------------------------------------------------------------------------------------|------------------------------------------------------------|
| Opioid analgesic medications included in the study's definition of prescription opioids                                                      | Fentanyl                                                   |
|                                                                                                                                              | Dihydrocodeine with pain reliever                          |
|                                                                                                                                              | Codeine / dihydrocodeine / hydrocodone with pain reliever  |
|                                                                                                                                              | Morphine                                                   |
|                                                                                                                                              | Oxycodone                                                  |
|                                                                                                                                              | Tramadol                                                   |
|                                                                                                                                              | Meperedine                                                 |
|                                                                                                                                              | Hydromorphone                                              |
|                                                                                                                                              | Tapentadol                                                 |
|                                                                                                                                              | Levorphanol                                                |
|                                                                                                                                              | Nalbuphine                                                 |
|                                                                                                                                              | Oxymorphone                                                |
|                                                                                                                                              | Pentazocine                                                |
| Opioid antitussives and medication-assisted treatments for opioid use disorders excluded from the study's definition of prescription opioids | Methadone                                                  |
|                                                                                                                                              | Codeine / dihydrocodeine / hydrocodone with cough medicine |
|                                                                                                                                              | Buprenorphine                                              |
|                                                                                                                                              | Suboxone                                                   |
|                                                                                                                                              | Naloxone                                                   |
|                                                                                                                                              | Ondansetron                                                |

**eTable 4.** ICD-9 typology to identify pain diagnosis claims

| Pain Diagnosis Claims                   | ICD-9 Code | Description of Code                                                     |
|-----------------------------------------|------------|-------------------------------------------------------------------------|
| Acute pain                              | 338.1      | Acute pain                                                              |
| Backache                                | 724.5      | Backache, unspecified                                                   |
|                                         | 724.8      | Other symptoms referable to back                                        |
| Cardiovascular and circulatory diseases | 136.1      | Behcet's syndrome                                                       |
|                                         | 393        | Chronic rheumatic pericarditis                                          |
|                                         | 415.1      | Pulmonary embolism and infarction                                       |
|                                         | 420        | Acute pericarditis                                                      |
|                                         | 422        | Acute myocarditis                                                       |
|                                         | 429        | Myocarditis, unspecified                                                |
|                                         | 444.2      | Embolism and thrombosis of arteries of the extremities.                 |
|                                         | 444.8      | Embolism and thrombosis of other specified artery                       |
|                                         | 444.9      | Embolism and thrombosis of unspecified artery.                          |
|                                         | 445        | Atheroembolism                                                          |
|                                         | 447.6      | Arteritis, unspecified                                                  |
|                                         | 449        | Septic arterial embolism                                                |
|                                         | 451        | Phlebitis and thrombophlebitis                                          |
|                                         | 453        | Budd-chiari syndrome                                                    |
|                                         | 453.1      | Thrombophlebitis migrans                                                |
|                                         | 453.4      | Acute venous embolism and thrombosis of deep vessels of lower extremity |
|                                         | 453.82     | Acute deep venous thrombosis (DVT) of left arm vein                     |
|                                         | 453.83     | Acute venous embolism and thrombosis of upper extremity, unspecified    |
|                                         | 453.84     | Acute venous embolism and thrombosis of axillary veins                  |
|                                         | 453.89     | Acute venous embolism and thrombosis of other specified veins           |
|                                         | 454        | Varicose veins of lower extremities with ulcer                          |
|                                         | 454.1      | Varicose veins of lower extremities with inflammation                   |
|                                         | 454.2      | Varicose veins of lower extremities with ulcer and inflammation         |
|                                         | 454.8      | Varicose veins of lower extremities with other complications            |
|                                         | 457.1      | Other lymphedema                                                        |
|                                         | 457.2      | Lymphangitis                                                            |
| 786.5                                   | Chest pain |                                                                         |
| Cervicalgia                             | 723.1      | Cervicalgia                                                             |
|                                         | 723.5      | Torticollis, unspecified                                                |
| Chronic pain                            | 338.2      | Chronic pain                                                            |
|                                         | 338.4      | Chronic pain syndrome                                                   |
| Degeneration of intervertebral disc     | 722.4      | Other cervical disc degeneration, unspecified cervical region           |
|                                         | 722.5      | Degeneration of thoracic or lumbar intervertebral disc                  |
|                                         | 722.6      | Degeneration of intervertebral disc, site unspecified                   |
| Diseases of connective tissue           | 710.0      | Systemic lupus erythematosus                                            |
|                                         | 710.1      | Systemic sclerosis                                                      |
|                                         | 723.6      | Panniculitis specified as affecting neck                                |
|                                         | 727        | Synovitis and tenosynovitis                                             |
|                                         | 727.2      | Specific bursitides often of occupational origin                        |
|                                         | 727.3      | Other bursitis                                                          |
|                                         | 727.6      | Rupture of tendon nontraumatic                                          |



|                                 |        |                                                                     |
|---------------------------------|--------|---------------------------------------------------------------------|
|                                 | 729.3  | Panniculitis unspecified                                            |
|                                 | 729.4  | Fasciitis, unspecified                                              |
| Disorders of joint              | 099.3  | Reactive arthritis                                                  |
|                                 | 713    | Arthropathy associated with other disorders classified elsewhere    |
|                                 | 716    | Other and unspecified arthropathies                                 |
|                                 | 717    | Internal derangement of knee                                        |
|                                 | 718    | Articular cartilage disorder                                        |
|                                 | 718.1  | Loose body in joint                                                 |
|                                 | 718.2  | Pathological dislocation                                            |
|                                 | 718.3  | Recurrent dislocation of joint                                      |
|                                 | 718.8  | Other joint derangement not elsewhere classified                    |
|                                 | 718.9  | Unspecified derangement of joint                                    |
|                                 | 719.1  | Hemarthrosis                                                        |
|                                 | 719.2  | Villonodular synovitis                                              |
|                                 | 719.3  | Palindromic rheumatism                                              |
|                                 | 719.4  | Pain in joint                                                       |
|                                 | 729    | Rheumatism, unspecified and fibrositis                              |
|                                 | 274.0  | Gouty arthropathy                                                   |
|                                 | 274.9  | Gout, unspecified.                                                  |
|                                 | 712    | Crystal arthropathies                                               |
|                                 | 714.0  | Rheumatoid arthritis, unspecified                                   |
|                                 | 714.1  | Felty's syndrome                                                    |
|                                 | 714.2  | Other rheumatoid arthritis with visceral or systemic involvement    |
|                                 | 714.3  | Juvenile chronic polyarthritis                                      |
|                                 | 714.4  | Chronic post-rheumatic arthropathy                                  |
|                                 | 714.89 | Other specified inflammatory polyarthropathies                      |
|                                 | 714.9  | Unspecified inflammatory polyarthropathy                            |
|                                 | 696    | Psoriasis and similar disorders                                     |
|                                 | 720    | Ankylosing spondylitis and other inflammatory spondylopathies       |
| Disorders of bone and cartilage | 588.0  | Renal osteodystrophy                                                |
|                                 | 724.6  | Disorders of sacrum                                                 |
|                                 | 724.7  | Disorders of coccyx                                                 |
|                                 | 731.2  | Hypertrophic pulmonary osteoarthropathy                             |
|                                 | 733.1  | Pathologic fracture                                                 |
|                                 | 733.4  | Aseptic necrosis of bone                                            |
|                                 | 733.93 | Stress fracture of tibia or fibula                                  |
|                                 | 733.94 | Stress fracture, unspecified toe(s), initial encounter for fracture |
|                                 | 733.95 | Stress fracture of other bone                                       |
|                                 | 733.96 | Stress fracture of femoral neck                                     |
|                                 | 733.97 | Stress fracture of shaft of femur                                   |
|                                 | 733.98 | Stress fracture of pelvis                                           |
|                                 | 726.0  | Adhesive capsulitis of unspecified shoulder.                        |
|                                 | 726.1  | Rotator cuff syndrome of shoulder and allied disorders.             |
|                                 | 726.2  | Other affections of shoulder region, not elsewhere classified       |
|                                 | 726.3  | Enthesopathy of elbow region                                        |
|                                 | 726.4  | Enthesopathy of wrist and carpus                                    |

|                                     |                 |                                                                                  |
|-------------------------------------|-----------------|----------------------------------------------------------------------------------|
|                                     | 726.5           | Enthesopathy of hip region                                                       |
|                                     | 726.6           | Enthesopathy of knee                                                             |
|                                     | 726.7           | Enthesopathy of ankle and tarsus.                                                |
|                                     | 726.8           | Other peripheral enthesopathies                                                  |
|                                     | 726.9           | Unspecified enthesopathy                                                         |
| Displacement of intervertebral disc | 722.0           | Displacement of cervical intervertebral disc without myelopathy                  |
|                                     | 722.1           | Displacement of thoracic or lumbar intervertebral disc without myelopathy        |
|                                     | 722.2           | Unspecified thoracic, thoracolumbar and lumbosacral intervertebral disc disorder |
|                                     | 722.3           | Schmorl's nodes                                                                  |
| Generalized pain, symptoms          | 780.96          | Pain, unspecified                                                                |
| Headache syndromes                  | 339             | Other headache syndromes                                                         |
|                                     | 784             | Headache                                                                         |
|                                     | 346             | Migraine                                                                         |
| Myopathy                            | 359.4           | Toxic myopathy                                                                   |
|                                     | 359.5           | Myopathy in endocrine diseases classified elsewhere                              |
|                                     | 359.6           | Symptomatic inflammatory myopathy in diseases classified elsewhere               |
|                                     | 359.7           | Inflammatory and immune myopathies, not elsewhere classified                     |
|                                     | 359.8           | Other myopathies                                                                 |
|                                     | 359.9           | Myopathy, unspecified                                                            |
|                                     | 710.3           | Dermatomyositis                                                                  |
|                                     | 710.4           | Polymyositis                                                                     |
|                                     | 710.5           | Eosinophilia myalgia syndrome                                                    |
|                                     | 725             | Polymyalgia rheumatica                                                           |
|                                     | 728.1           | Muscular calcification and ossification                                          |
|                                     | 728.81          | Interstitial myositis                                                            |
|                                     | 728.83          | Rupture of muscle, nontraumatic                                                  |
|                                     | 728.85          | Spasm of muscle                                                                  |
|                                     | 728.88          | Rhabdomyolysis                                                                   |
|                                     | 729.1           | Myalgia and myositis, unspecified                                                |
|                                     | 729.7           | Nontraumatic compartment syndrome                                                |
| 729.82                              | Cramp and spasm |                                                                                  |
| Osteoarthritis                      | 715             | Osteoarthrosis and allied disorders                                              |
| Other back disorders                | 724.2           | Lumbago                                                                          |
|                                     | 724.9           | Other unspecified back disorders                                                 |
|                                     | 721             | Spondylosis and allied disorders                                                 |
| Other cervical region disorders     | 723.2           | Cervicocranial syndrome                                                          |
|                                     | 723.3           | Cervicobrachial syndrome.                                                        |
|                                     | 723.4           | Brachial neuritis or radiculitis, not otherwise specified                        |
| Other digestive diseases            | 455.1           | Internal thrombosed hemorrhoids                                                  |
|                                     | 455.4           | External thrombosed hemorrhoids                                                  |
|                                     | 455.7           | Unspecified thrombosed hemorrhoids                                               |
|                                     | 530.1           | Esophagitis                                                                      |
|                                     | 530.12          | Acute esophagitis                                                                |
|                                     | 530.13          | Eosinophilic esophagitis                                                         |
|                                     | 530.19          | Other esophagitis                                                                |

|        |                                                                               |
|--------|-------------------------------------------------------------------------------|
| 530.2  | Ulcer of esophagus                                                            |
| 530.4  | Perforation of esophagus                                                      |
| 530.7  | Gastroesophageal laceration-hemorrhage syndrome                               |
| 536.3  | Gastroparesis                                                                 |
| 536.8  | Dyspepsia and other specified disorders of function of stomach                |
| 537.3  | Other obstruction of duodenum                                                 |
| 538    | Gastrointestinal mucositis (ulcerative)                                       |
| 540    | Acute appendicitis                                                            |
| 541    | Appendicitis, unqualified                                                     |
| 542    | Other appendicitis                                                            |
| 557    | Vascular insufficiency of intestine                                           |
| 560.1  | Paralytic ileus                                                               |
| 560.2  | Volvulus                                                                      |
| 560.89 | Other specified intestinal obstruction                                        |
| 560.9  | Unspecified intestinal obstruction                                            |
| 562.01 | Diverticulitis of small intestine (without mention of hemorrhage)             |
| 562.03 | Diverticulitis of small intestine with hemorrhage                             |
| 562.11 | Diverticulitis of colon (without mention of hemorrhage)                       |
| 562.13 | Diverticulitis of colon with hemorrhage                                       |
| 569.3  | Hemorrhage of rectum and anus                                                 |
| 569.41 | Ulcer of anus and rectum                                                      |
| 569.42 | Anal or rectal pain                                                           |
| 569.82 | Ulceration of intestine                                                       |
| 569.83 | Perforation of intestine                                                      |
| 578    | Gastrointestinal hemorrhage                                                   |
| 789    | Other symptoms involving abdomen and pelvis                                   |
| 789.6  | Abdominal tenderness                                                          |
| 789.7  | Colic                                                                         |
| 573.4  | Hepatic infarction                                                            |
| 577    | Diseases of pancreas                                                          |
| 577.1  | Other chronic pancreatitis                                                    |
| 577.2  | Cyst and pseudocyst of pancreas                                               |
| 574    | Cholelithiasis                                                                |
| 574.1  | Calculus of gallbladder with other cholecystitis                              |
| 574.3  | Calculus of bile duct with acute cholecystitis                                |
| 574.4  | Calculus of bile duct with other cholecystitis                                |
| 574.51 | Calculus of bile duct without mention of cholecystitis, with obstruction      |
| 574.7  | Calculus of gallbladder and bile duct with other cholecystitis                |
| 574.8  | Calculus of gallbladder and bile duct with acute and chronic cholecystitis    |
| 574.91 | Calculus of gallbladder and bile duct without cholecystitis, with obstruction |
| 575    | Other disorders of gallbladder                                                |
| 575.1  | Other cholecystitis                                                           |
| 575.12 | Acute and chronic cholecystitis                                               |
| 575.2  | Obstruction of gallbladder                                                    |
| 575.3  | Hydrops of gallbladder                                                        |
| 575.4  | Cholangitis                                                                   |

|                           |         |                                                                                                                                                                                |
|---------------------------|---------|--------------------------------------------------------------------------------------------------------------------------------------------------------------------------------|
|                           | 576.1   | Cholangitis                                                                                                                                                                    |
|                           | 576.2   | Obstruction of bile duct                                                                                                                                                       |
|                           | 576.3   | Perforation of bile duct                                                                                                                                                       |
|                           | 535     | Gastritis and duodenitis                                                                                                                                                       |
|                           | 535.3   | Alcoholic gastritis                                                                                                                                                            |
|                           | 535.4   | Other specified gastritis                                                                                                                                                      |
|                           | 535.41  | Other specified gastritis, with hemorrhage                                                                                                                                     |
|                           | 535.5   | Unspecified gastritis and gastroduodenitis                                                                                                                                     |
|                           | 535.6   | Duodenitis                                                                                                                                                                     |
|                           | 535.7   | Eosinophilic gastritis                                                                                                                                                         |
|                           | 550.1   | Inguinal hernia with obstruction without mention of gangrene                                                                                                                   |
|                           | 552     | Other hernia of abdominal cavity with obstruction but without mention of gangrene                                                                                              |
|                           | 558.9   | Other and unspecified noninfectious gastroenteritis and colitis                                                                                                                |
| Other injury              | 800-897 | Fracture of skull, spine, trunk, upper or lower limb; dislocation; sprains/strains, intracranial injury, internal injury, open wound of head, neck, trunk, upper or lower limb |
|                           | 920     | Contusion of face, scalp, and neck except eye(s)                                                                                                                               |
|                           | 921     | Contusion of eye and adnexa                                                                                                                                                    |
|                           | 921.1   | Contusion of eyelids and periocular area                                                                                                                                       |
|                           | 922     | Contusion of trunk                                                                                                                                                             |
|                           | 923     | Contusion of upper limb                                                                                                                                                        |
|                           | 924     | Contusion of lower limb and of other and unspecified sites                                                                                                                     |
|                           | 925-949 | Crushing injury; effects of foreign body entering through orifice; burns                                                                                                       |
|                           | 953     | Injury to nerve roots and spinal plexus                                                                                                                                        |
|                           | 954.8   | Injury to other specified nerve(s) of trunk, excluding shoulder and pelvic girdles                                                                                             |
|                           | 954.9   | Injury to unspecified nerve of trunk excluding shoulder and pelvic girdles                                                                                                     |
|                           | 955-957 | Injury to peripheral nerve(s) of shoulder girdle, upper limb, lower limb, pelvic girdle, and other or unspecified nerves                                                       |
|                           | 958.9   | Traumatic compartment syndrome                                                                                                                                                 |
|                           | 959     | Injury other and unspecified                                                                                                                                                   |
|                           | 997.41  | Retained cholelithiasis following cholecystectomy                                                                                                                              |
|                           | 997.62  | Infection (chronic) of amputation stump                                                                                                                                        |
| Pain in limb              | 729.5   | Pain in unspecified limb.                                                                                                                                                      |
| Pain in thoracic spine    | 724.1   | Pain in thoracic spine                                                                                                                                                         |
| Peripheral nerve disorder | 354     | Carpal tunnel syndrome, unspecified upper limb                                                                                                                                 |
|                           | 355     | Mononeuritis of lower limb and unspecified site                                                                                                                                |
|                           | 353     | Nerve root and plexus disorders                                                                                                                                                |
|                           | 356     | Hereditary and idiopathic peripheral neuropathy                                                                                                                                |
|                           | 356.2   | Hereditary sensory neuropathy                                                                                                                                                  |
|                           | 356.4   | Idiopathic progressive polyneuropathy                                                                                                                                          |
|                           | 356.8   | Other hereditary and idiopathic neuropathies                                                                                                                                   |
|                           | 356.9   | Hereditary and idiopathic neuropathy, unspecified                                                                                                                              |
|                           | 357.1   | Polyneuropathy in collagen vascular disease                                                                                                                                    |
|                           | 357.2   | Polyneuropathy in diabetes                                                                                                                                                     |
|                           | 357.4   | Polyneuropathy in other diseases classified elsewhere                                                                                                                          |
|                           | 357.5   | Alcoholic polyneuropathy                                                                                                                                                       |

|                                                 |        |                                                              |
|-------------------------------------------------|--------|--------------------------------------------------------------|
|                                                 | 357.7  | Polyneuropathy due to other toxic agents                     |
|                                                 | 357.81 | Chronic inflammatory demyelinating polyneuritis.             |
|                                                 | 357.82 | Critical illness polyneuropathy                              |
|                                                 | 357.89 | Other inflammatory and toxic neuropathy                      |
|                                                 | 357.9  | Unspecified inflammatory and toxic neuropathy                |
|                                                 | 729.2  | Neuralgia, neuritis, and radiculitis, unspecified            |
|                                                 | 350    | Trigeminal nerve disorders                                   |
| Postlaminectomy syndrome or failed back surgery | 722.8  | Postlaminectomy syndrome                                     |
| Sciatica                                        | 724.3  | Sciatica, unspecified side                                   |
| Thoracic or lumbosacralneuritis or radiculitis  | 724.4  | Thoracic or lumbosacral neuritis or radiculitis, unspecified |

**eTable 5.** ICD-10 crosswalk from ICD-9 typology to identify pain diagnosis claims

| Pain Diagnosis Claims                   | ICD-10 Codes                                                                                                                                                                                                                                                                                                                                                                                                                                                                                                                                                                                                                                                                                                                                                                                                                                                                                                                                                                                                                                                                                                                                                                                                                                                                                                                                                                                                                                                                                                                                                                                                                                                                                                                                                                                                                                                                                                                                                                                                              |
|-----------------------------------------|---------------------------------------------------------------------------------------------------------------------------------------------------------------------------------------------------------------------------------------------------------------------------------------------------------------------------------------------------------------------------------------------------------------------------------------------------------------------------------------------------------------------------------------------------------------------------------------------------------------------------------------------------------------------------------------------------------------------------------------------------------------------------------------------------------------------------------------------------------------------------------------------------------------------------------------------------------------------------------------------------------------------------------------------------------------------------------------------------------------------------------------------------------------------------------------------------------------------------------------------------------------------------------------------------------------------------------------------------------------------------------------------------------------------------------------------------------------------------------------------------------------------------------------------------------------------------------------------------------------------------------------------------------------------------------------------------------------------------------------------------------------------------------------------------------------------------------------------------------------------------------------------------------------------------------------------------------------------------------------------------------------------------|
| Acute pain                              | G89.11, G89.12, G89.18                                                                                                                                                                                                                                                                                                                                                                                                                                                                                                                                                                                                                                                                                                                                                                                                                                                                                                                                                                                                                                                                                                                                                                                                                                                                                                                                                                                                                                                                                                                                                                                                                                                                                                                                                                                                                                                                                                                                                                                                    |
| Backache                                | M54.9, M54.08                                                                                                                                                                                                                                                                                                                                                                                                                                                                                                                                                                                                                                                                                                                                                                                                                                                                                                                                                                                                                                                                                                                                                                                                                                                                                                                                                                                                                                                                                                                                                                                                                                                                                                                                                                                                                                                                                                                                                                                                             |
| Cardiovascular and circulatory diseases | I09.2, I26.90, I26.92, I26.99, I30.0, I30.8, I30.9, I32, I40.0, I40.1, I40.8, I40.9, I41, I51.4, I74.2, I74.3, I74.5, I74.8, I74.9, I75.019, I75.029, I75.81, I75.89, I76, I77.6, I80.10, I80.209, I80.219, I80.3, I80.8, I80.9, I82.0, I82.1, I82.409, I82.419, I82.429, I82.439, I82.449, I82.499, I82.4Y9, I82.4Z9, I82.609, I82.629, I82.890, I82.A19, I83.009, I83.019, I83.029, I83.10, I83.209, I83.899, I89.0, I89.1, M35.2, T80.0XX, T81.718, T81.72X, T82.817, T82.818, R07.1, R07.2, R07.81, R07.82, R07.89, R07.9                                                                                                                                                                                                                                                                                                                                                                                                                                                                                                                                                                                                                                                                                                                                                                                                                                                                                                                                                                                                                                                                                                                                                                                                                                                                                                                                                                                                                                                                                             |
| Cervicalgia                             | M43.6, M54.2                                                                                                                                                                                                                                                                                                                                                                                                                                                                                                                                                                                                                                                                                                                                                                                                                                                                                                                                                                                                                                                                                                                                                                                                                                                                                                                                                                                                                                                                                                                                                                                                                                                                                                                                                                                                                                                                                                                                                                                                              |
| Chronic pain                            | G89.21, G89.22, G89.28, G89.29, G89.4                                                                                                                                                                                                                                                                                                                                                                                                                                                                                                                                                                                                                                                                                                                                                                                                                                                                                                                                                                                                                                                                                                                                                                                                                                                                                                                                                                                                                                                                                                                                                                                                                                                                                                                                                                                                                                                                                                                                                                                     |
| Degeneration of intervertebral disc     | M50.30, M51.34, M51.35, M51.36, M51.37                                                                                                                                                                                                                                                                                                                                                                                                                                                                                                                                                                                                                                                                                                                                                                                                                                                                                                                                                                                                                                                                                                                                                                                                                                                                                                                                                                                                                                                                                                                                                                                                                                                                                                                                                                                                                                                                                                                                                                                    |
| Diseases of connective tissue           | M32.10, M34.0, M34.1, M34.9, M54.02, M66.239, M66.249, M66.259, M66.269, M66.339, M66.349, M66.369, M66.829, M66.879, M66.88, M66.9, M70.039, M70.30, M70.40, M71.50, M72.9, M75.120, M77.40, M79.3, M79.4                                                                                                                                                                                                                                                                                                                                                                                                                                                                                                                                                                                                                                                                                                                                                                                                                                                                                                                                                                                                                                                                                                                                                                                                                                                                                                                                                                                                                                                                                                                                                                                                                                                                                                                                                                                                                |
| Disorder of joint                       | M02.30, M02.00, M02.20, M02.9, M12.10, M12.119, M12.129, M12.139, M12.149, M12.159, M12.169, M12.179, M12.18, M12.19, M12.20, M12.219, M12.229, M12.239, M12.249, M12.259, M12.269, M12.279, M12.28, M12.29, M12.30, M12.319, M12.329, M12.339, M12.349, M12.359, M12.369, M12.379, M12.38, M12.39, M12.40, M12.419, M12.429, M12.439, M12.449, M12.459, M12.469, M12.479, M12.48, M12.49, M12.50, M12.519, M12.529, M12.539, M12.549, M12.559, M12.569, M12.579, M12.58, M12.59, M12.80, M12.819, M12.829, M12.839, M12.849, M12.859, M12.869, M12.879, M12.88, M12.89, M12.9, M13.0, M13.10, M13.119, M13.129, M13.139, M13.149, M13.159, M13.169, M13.179, M13.80, M13.819, M13.829, M13.839, M13.849, M13.859, M13.869, M13.879, M13.88, M13.89, M14.60, M14.80, M22.40, M23.009, M23.202, M23.205, M23.219, M23.229, M23.239, M23.249, M23.259, M23.269, M23.305, M23.319, M23.329, M23.339, M23.349, M23.359, M23.369, M23.40, M23.50, M23.8X9, M23.90, M24.00, M24.019, M24.029, M24.039, M24.049, M24.059, M24.073, M24.076, M24.08, M24.10, M24.119, M24.129, M24.139, M24.149, M24.159, M24.173, M24.176, M24.30, M24.319, M24.329, M24.339, M24.349, M24.359, M24.369, M24.373, M24.376, M24.40, M24.419, M24.429, M24.439, M24.443, M24.446, M24.459, M24.469, M24.473, M24.476, M24.80, M24.819, M24.829, M24.839, M24.849, M24.859, M24.873, M24.876, M24.9, M25.00, M25.019, M25.029, M25.039, M25.049, M25.059, M25.069, M25.073, M25.076, M25.08, M25.50, M25.519, M25.529, M25.539, M25.541, M25.542, M25.549, M25.559, M25.569, M25.579, M36.2, M36.3, M36.4, M43.4, M43.5X9, M79.0, M79.646, M05.00, M05.30, M05.60, M06.1, M06.4, M06.9, M08.00, M08.3, M08.40, M12.00, L40.54, L40.59, M45.9, M46.00, M46.1, M46.80, M46.90, M49.80, M10.00, M10.9, M11.20, M11.219, M11.229, M11.239, M11.249, M11.259, M11.269, M11.279, M11.28, M11.29, M11.80, M11.819, M11.829, M11.839, M11.849, M11.859, M11.869, M11.879, M11.88, M11.89, M11.9, M1A.00X1, M1A.20X1, M1A.30X1, M1A.40X1, M1A.9XX0, M1A.9XX1 |
| Displacement of intervertebral disc     | M50.20, M51.24, M51.25, M51.26, M51.27, M51.44, M51.45, M51.46, M51.47, M51.9                                                                                                                                                                                                                                                                                                                                                                                                                                                                                                                                                                                                                                                                                                                                                                                                                                                                                                                                                                                                                                                                                                                                                                                                                                                                                                                                                                                                                                                                                                                                                                                                                                                                                                                                                                                                                                                                                                                                             |
| Generalized pain, symptoms              | R52                                                                                                                                                                                                                                                                                                                                                                                                                                                                                                                                                                                                                                                                                                                                                                                                                                                                                                                                                                                                                                                                                                                                                                                                                                                                                                                                                                                                                                                                                                                                                                                                                                                                                                                                                                                                                                                                                                                                                                                                                       |
| Headache syndromes                      | G44.009, G44.019, G44.029, G44.039, G44.049, G44.059, G44.099, G44.1, G44.209, G44.219, G44.221, G44.229, G44.309, G44.319, G44.329, G44.41, G44.51, G44.52, G44.53, G44.59, G44.81, G44.82, G44.83, G44.84, G44.85, G44.89, R51, G43.001, G43.009, G43.011, G43.019, G43.101, G43.109, G43.111, G43.119, G43.401, G43.409, G43.411, G43.419, G43.501, G43.509, G43.511, G43.519, G43.601, G43.609, G43.611, G43.619, G43.701, G43.709, G43.711, G43.719, G43.801, G43.809, G43.811, G43.819, G43.821, G43.829, G43.831, G43.839, G43.901, G43.909, G43.911, G43.919, G43.A0, G43.A1, G43.B0, G43.B1, G43.C0, G43.C1, G43.D0, G43.D1                                                                                                                                                                                                                                                                                                                                                                                                                                                                                                                                                                                                                                                                                                                                                                                                                                                                                                                                                                                                                                                                                                                                                                                                                                                                                                                                                                                      |
| Myopathy                                | G72.2, G72.41, G72.49, G72.81, G72.89, G72.9, G73.7, M33.03, M33.13, M33.20, M33.90, M33.93, M35.3, M35.8, M60.10, M60.9, M61.00, M61.10, M61.40, M61.59, M61.9, M62.10, M62.40, M62.82, M62.838, M79.1, M79.7, M79.A19, M79.A29, M79.A3, M79.A9, R25.2                                                                                                                                                                                                                                                                                                                                                                                                                                                                                                                                                                                                                                                                                                                                                                                                                                                                                                                                                                                                                                                                                                                                                                                                                                                                                                                                                                                                                                                                                                                                                                                                                                                                                                                                                                   |
| Osteoarthritis                          | M15.0, M15.1, M15.2, M15.3, M15.8, M15.9, M16.10, M16.7, M16.9, M17.10, M17.5, M17.9, M18.9, M19.019, M19.029, M19.039, M19.049, M19.079, M19.219, M19.229, M19.239, M19.249, M19.279, M19.90, M19.91, M19.93                                                                                                                                                                                                                                                                                                                                                                                                                                                                                                                                                                                                                                                                                                                                                                                                                                                                                                                                                                                                                                                                                                                                                                                                                                                                                                                                                                                                                                                                                                                                                                                                                                                                                                                                                                                                             |
| Other back disorders                    | M54.5, M43.8X9, M53.9, M47.10, M47.12, M47.14, M47.16, M47.812, M47.814, M47.817, M47.819, M48.10, M48.20, M48.30, M48.9                                                                                                                                                                                                                                                                                                                                                                                                                                                                                                                                                                                                                                                                                                                                                                                                                                                                                                                                                                                                                                                                                                                                                                                                                                                                                                                                                                                                                                                                                                                                                                                                                                                                                                                                                                                                                                                                                                  |
| Other cervical region disorders         | M53.0, M53.1, M54.12                                                                                                                                                                                                                                                                                                                                                                                                                                                                                                                                                                                                                                                                                                                                                                                                                                                                                                                                                                                                                                                                                                                                                                                                                                                                                                                                                                                                                                                                                                                                                                                                                                                                                                                                                                                                                                                                                                                                                                                                      |
| Other digestive diseases                | K20.0, K20.8, K20.9, K22.10, K22.11, K22.3, K22.6, K30, K31.5, K31.84, K35.2, K35.3, K35.80, K35.89, K36, K37, K55.011, K55.012, K55.019, K55.021, K55.022, K55.029, K55.031, K55.032, K55.039, K55.041, K55.042, K55.049, K55.051, K55.052, K55.059, K55.061, K55.062, K55.069, K55.30, K55.31, K55.32, K55.33, K56.0, K56.2, K56.600, K56.601, K56.609, K56.690, K56.691, K56.699, K56.7, K57.12, K57.13, K57.32, K57.33, K62.5, K62.6, K62.89, K63.1, K63.3, K64.5, K64.8, K92.0, K92.1, K92.2, K92.81, R10.10, R10.11, R10.12, R10.13, R10.30, R10.31, R10.32, R10.33, R10.811, R10.812, R10.813, R10.814, R10.815, R10.816, R10.817, R10.819, R10.821, R10.822, R10.823, R10.824, R10.825, R10.826, R10.827, R10.829, R10.83, R10.84, R10.9, K76.3, K85.90, K85.91, K85.92, K86.1, K86.2, K86.3, K80.00, K80.01, K80.18, K80.19, K80.42, K80.43, K80.44, K80.45, K80.51, K80.64, K80.65, K80.66, K80.67, K80.71, K81.0, K81.2, K81.9, K82.0, K82.1, K82.2, K83.0, K83.1, K83.2, K29.00, K29.01, K29.20, K29.21, K29.60, K29.61, K29.70, K29.71, K29.80, K29.81, K29.90, K29.91, K40.30, K40.31, K40.00, K40.01, K52.3, K52.89, K52.9, K41.00, K41.01, K41.30, K41.31, K42.0, K43.0, K43.6, K44.0, K45.0, K46.0                                                                                                                                                                                                                                                                                                                                                                                                                                                                                                                                                                                                                                                                                                                                                                                                       |

|              |                                                                                                                                                                                                                                                                                                                                                                                                                                                                                                                                                                                                                                                                                                                                                                                                                                                                                                                                                                                                                                                                                                                                                                                                                                                                                                                                                                                                                                                                                                                                                                                                                                                                                                                                                                                                                                                                                                                                                                                                                                                                                                                                                                                                                                                                                                                                                                                                                                                                                                                                                                                                                                                                                                                                                                                                                                                                                                                                                                                                                                                                                                                                                                                                                                                                                                                                                                                                                                                                                                                                                                                                                                                                                                                                                                                                                                                                                                                                                                                                                                                                                                                                                                                                                                                                                                                                                                                                                                                                                                                                                                                                                                                                                                                                                                                                                                                                                                                                                                                                                                                                                                                                                                                                                                                                                                                                                                                                                                                                                                                                                                                                                                                                                                                                                                                                                                                                                                                                                                                                                                                                                                                                                                                                                                                                                                                                                                                                                                                                                                                                                                                                                                                                                                                                                                                                                                                                                                                                                                                                                                                                                                                                                                                                                                                                                                                                                                                                                                                                                                                                                                                                                                                                                                                                                                                                                                                                                                                                                                       |
|--------------|-----------------------------------------------------------------------------------------------------------------------------------------------------------------------------------------------------------------------------------------------------------------------------------------------------------------------------------------------------------------------------------------------------------------------------------------------------------------------------------------------------------------------------------------------------------------------------------------------------------------------------------------------------------------------------------------------------------------------------------------------------------------------------------------------------------------------------------------------------------------------------------------------------------------------------------------------------------------------------------------------------------------------------------------------------------------------------------------------------------------------------------------------------------------------------------------------------------------------------------------------------------------------------------------------------------------------------------------------------------------------------------------------------------------------------------------------------------------------------------------------------------------------------------------------------------------------------------------------------------------------------------------------------------------------------------------------------------------------------------------------------------------------------------------------------------------------------------------------------------------------------------------------------------------------------------------------------------------------------------------------------------------------------------------------------------------------------------------------------------------------------------------------------------------------------------------------------------------------------------------------------------------------------------------------------------------------------------------------------------------------------------------------------------------------------------------------------------------------------------------------------------------------------------------------------------------------------------------------------------------------------------------------------------------------------------------------------------------------------------------------------------------------------------------------------------------------------------------------------------------------------------------------------------------------------------------------------------------------------------------------------------------------------------------------------------------------------------------------------------------------------------------------------------------------------------------------------------------------------------------------------------------------------------------------------------------------------------------------------------------------------------------------------------------------------------------------------------------------------------------------------------------------------------------------------------------------------------------------------------------------------------------------------------------------------------------------------------------------------------------------------------------------------------------------------------------------------------------------------------------------------------------------------------------------------------------------------------------------------------------------------------------------------------------------------------------------------------------------------------------------------------------------------------------------------------------------------------------------------------------------------------------------------------------------------------------------------------------------------------------------------------------------------------------------------------------------------------------------------------------------------------------------------------------------------------------------------------------------------------------------------------------------------------------------------------------------------------------------------------------------------------------------------------------------------------------------------------------------------------------------------------------------------------------------------------------------------------------------------------------------------------------------------------------------------------------------------------------------------------------------------------------------------------------------------------------------------------------------------------------------------------------------------------------------------------------------------------------------------------------------------------------------------------------------------------------------------------------------------------------------------------------------------------------------------------------------------------------------------------------------------------------------------------------------------------------------------------------------------------------------------------------------------------------------------------------------------------------------------------------------------------------------------------------------------------------------------------------------------------------------------------------------------------------------------------------------------------------------------------------------------------------------------------------------------------------------------------------------------------------------------------------------------------------------------------------------------------------------------------------------------------------------------------------------------------------------------------------------------------------------------------------------------------------------------------------------------------------------------------------------------------------------------------------------------------------------------------------------------------------------------------------------------------------------------------------------------------------------------------------------------------------------------------------------------------------------------------------------------------------------------------------------------------------------------------------------------------------------------------------------------------------------------------------------------------------------------------------------------------------------------------------------------------------------------------------------------------------------------------------------------------------------------------------------------------------------------------------------------------------------------------------------------------------------------------------------------------------------------------------------------------------------------------------------------------------------------------------------------------------------------------------------------------------------------------------------------------------------------------------------------------------------------------------------------------------------------------------------|
| Other injury | <p>K91.86, S00.10XA, S00.93XA, S01.00XA, S01.02XA, S01.109A, S01.119A, S01.129A, S01.139A, S01.149A, S01.159A, S01.20XA, S01.21XA, S01.22XA, S01.23XA, S01.24XA, S01.25XA, S01.309A, S01.329A, S01.409A, S01.422A, S01.429A, S01.501A, S01.502A, S01.512A, S01.521A, S01.522A, S01.80XA, S01.82XA, S01.90XA, S01.92XA, S02.0XXA, S02.0XXB, S02.101A, S02.101B, S02.102A, S02.102B, S02.109A, S02.109B, S02.2XXA, S02.2XXB, S02.30XA, S02.30XB, S02.31XA, S02.31XB, S02.32XA, S02.32XB, S02.400A, S02.400B, S02.401A, S02.401B, S02.402A, S02.402B, S02.40AA, S02.40AB, S02.40BA, S02.40BB, S02.40CA, S02.40CB, S02.40DA, S02.40DB, S02.40EA, S02.40EB, S02.40FA, S02.40FB, S02.42XA, S02.42XB, S02.5XXA, S02.5XXB, S02.600A, S02.600B, S02.601A, S02.601B, S02.602A, S02.602B, S02.609A, S02.609B, S02.610A, S02.610B, S02.611A, S02.611B, S02.612A, S02.612B, S02.620A, S02.620B, S02.621A, S02.621B, S02.622A, S02.622B, S02.630A, S02.630B, S02.631A, S02.631B, S02.632A, S02.632B, S02.640A, S02.640B, S02.641A, S02.641B, S02.642A, S02.642B, S02.650A, S02.650B, S02.651A, S02.651B, S02.652A, S02.652B, S02.66XA, S02.66XB, S02.670A, S02.670B, S02.671A, S02.671B, S02.672A, S02.672B, S02.69XA, S02.69XB, S02.91XA, S02.91XB, S02.92XA, S02.92XB, S03.00XA, S03.01XA, S03.02XA, S03.03XA, S03.1XXA, S03.40XA, S03.41XA, S03.42XA, S03.43XA, S03.8XXA, S03.9XXA, S05.20XA, S05.30XA, S05.40XA, S05.50XA, S05.60XA, S05.70XA, S05.90XA, S06.0X0A, S06.0X1A, S06.0X9A, S06.1X0A, S06.1X1A, S06.1X2A, S06.1X3A, S06.1X4A, S06.1X5A, S06.1X6A, S06.1X7A, S06.1X8A, S06.1X9A, S06.330A, S06.331A, S06.332A, S06.333A, S06.334A, S06.335A, S06.336A, S06.337A, S06.338A, S06.339A, S06.360A, S06.361A, S06.362A, S06.363A, S06.364A, S06.365A, S06.366A, S06.367A, S06.368A, S06.369A, S06.370A, S06.371A, S06.372A, S06.373A, S06.374A, S06.375A, S06.376A, S06.377A, S06.378A, S06.379A, S06.380A, S06.381A, S06.382A, S06.383A, S06.384A, S06.385A, S06.386A, S06.387A, S06.388A, S06.389A, S06.4X0A, S06.4X1A, S06.4X2A, S06.4X3A, S06.4X4A, S06.4X5A, S06.4X6A, S06.4X7A, S06.4X8A, S06.4X9A, S06.5X0A, S06.5X1A, S06.5X2A, S06.5X3A, S06.5X4A, S06.5X5A, S06.5X6A, S06.5X7A, S06.5X8A, S06.5X9A, S06.6X0A, S06.6X1A, S06.6X2A, S06.6X3A, S06.6X4A, S06.6X5A, S06.6X6A, S06.6X7A, S06.6X8A, S06.6X9A, S06.890A, S06.891A, S06.892A, S06.893A, S06.894A, S06.895A, S06.896A, S06.897A, S06.898A, S06.899A, S06.9X0A, S06.9X1A, S06.9X2A, S06.9X3A, S06.9X4A, S06.9X5A, S06.9X6A, S06.9X7A, S06.9X8A, S06.9X9A, S07.0XXA, S07.8XXA, S08.119A, S08.129A, S08.811A, S09.20XA, S09.309A, S09.399A, S09.8XXA, S09.90XA, S09.91XA, S09.93XA, S10.93XA, S11.012A, S11.014A, S11.019A, S11.022A, S11.024A, S11.029A, S11.10XA, S11.12XA, S11.20XA, S11.22XA, S11.80XA, S11.82XA, S11.90XA, S12.000A, S12.000B, S12.001A, S12.001B, S12.100A, S12.100B, S12.101A, S12.101B, S12.200A, S12.200B, S12.201A, S12.201B, S12.300A, S12.300B, S12.301A, S12.301B, S12.400A, S12.400B, S12.401A, S12.401B, S12.500A, S12.500B, S12.501A, S12.501B, S12.600A, S12.600B, S12.601A, S12.601B, S12.8XXA, S12.9XXA, S13.101A, S13.111A, S13.121A, S13.131A, S13.141A, S13.151A, S13.161A, S13.171A, S13.181A, S13.4XXA, S13.5XXA, S13.8XXA, S14.101A, S14.102A, S14.103A, S14.104A, S14.105A, S14.106A, S14.107A, S14.109A, S14.111A, S14.112A, S14.113A, S14.114A, S14.115A, S14.116A, S14.117A, S14.121A, S14.122A, S14.123A, S14.124A, S14.125A, S14.126A, S14.127A, S14.131A, S14.132A, S14.133A, S14.134A, S14.135A, S14.136A, S14.137A, S14.151A, S14.152A, S14.153A, S14.154A, S14.155A, S14.156A, S14.157A, S14.2XXA, S14.3XXA, S14.4XXA, S14.9XXA, S17.9XXA, S19.9XXA, S20.00XA, S20.20XA, S20.219A, S20.229A, S21.009A, S21.029A, S21.109A, S21.129A, S21.209A, S21.309A, S22.009A, S22.009B, S22.019A, S22.019B, S22.029A, S22.029B, S22.039A, S22.039B, S22.049A, S22.049B, S22.059A, S22.059B, S22.069A, S22.069B, S22.079A, S22.079B, S22.089A, S22.089B, S22.20XA, S22.20XB, S22.39XA, S22.39XB, S22.49XA, S22.49XB, S22.5XXA, S22.5XXB, S22.9XXA, S22.9XXB, S23.101A, S23.20XA, S23.3XXA, S23.41XA, S23.420A, S23.421A, S23.428A, S23.429A, S23.8XXA, S23.9XXA, S24.101A, S24.102A, S24.103A, S24.104A, S24.109A, S24.111A, S24.112A, S24.113A, S24.114A, S24.115A, S24.116A, S24.132A, S24.133A, S24.134A, S24.151A, S24.152A, S24.153A, S24.154A, S24.2XXA, S24.3XXA, S24.8XXA, S24.9XXA, S26.020A, S26.021A, S26.022A, S26.10XA, S26.90XA, S26.91XA, S26.92XA, S26.99XA, S27.0XXA, S27.1XXA, S27.2XXA, S27.309A, S27.329A, S27.339A, S27.409A, S27.809A, S27.813A, S27.819A, S27.893A, S27.899A, S27.9XXA, S28.0XXA, S29.019A, S29.8XXA, S30.0XXA, S30.1XXA, S30.201A, S30.202A, S31.000A, S31.001A, S31.020A, S31.102A, S31.105A, S31.109A, S31.122A, S31.125A, S31.129A, S31.20XA, S31.22XA, S31.30XA, S31.32XA, S31.40XA, S31.42XA, S31.501A, S31.502A, S31.522A, S31.541A, S31.609A, S31.802A, S31.809A, S32.009A, S32.009B, S32.019A, S32.019B, S32.029A, S32.029B, S32.039A, S32.039B, S32.049A, S32.049B, S32.059A, S32.059B, S32.10XA, S32.10XB, S32.2XXA, S32.2XXB, S32.309A, S32.309B, S32.409A, S32.409B, S32.501A, S32.501B, S32.502A, S32.502B, S32.509A, S32.509B, S32.609A, S32.609B, S32.810A, S32.810B, S32.811A, S32.811B, S32.82XA, S32.82XB, S32.89XA, S32.89XB, S32.9XXA, S32.9XXB, S33.101A, S33.2XXA, S33.39XA, S33.5XXA, S33.6XXA, S33.8XXA, S33.9XXA, S34.101A, S34.102A, S34.103A, S34.104A, S34.105A, S34.109A, S34.111A, S34.112A, S34.113A, S34.114A, S34.115A, S34.119A, S34.121A, S34.122A, S34.123A, S34.124A, S34.125A, S34.129A, S34.131A, S34.132A, S34.133A, S34.134A, S34.135A, S34.139A, S34.21XA, S34.22XA, S34.3XXA, S34.4XXA, S34.6XXA, S34.9XXA, S36.00XA, S36.020A, S36.021A, S36.029A, S36.030A, S36.031A, S36.032A, S36.09XA, S36.112A, S36.113A, S36.114A, S36.115A, S36.116A, S36.118A, S36.119A, S36.129A, S36.13XA, S36.200A, S36.201A, S36.202A, S36.209A, S36.30XA, S36.400A, S36.408A, S36.409A, S36.500A, S36.501A, S36.502A, S36.503A, S36.508A, S36.509A, S36.60XA, S36.81XA, S36.899A, S36.90XA, S37.009A, S37.019A, S37.029A, S37.039A, S37.049A, S37.059A, S37.069A, S37.10XA, S37.20XA, S37.30XA, S37.409A, S37.509A, S37.60XA, S37.819A, S37.829A, S37.899A, S37.90XA, S38.001A, S38.002A, S38.1XXA, S38.221A, S38.222A, S39.011A, S39.81XA, S39.82XA, S39.840A, S39.848A, S40.019A, S40.029A, S41.009A, S41.029A, S41.109A, S41.129A, S42.009A, S42.009B, S42.013A, S42.013B, S42.016A, S42.016B, S42.019A, S42.019B, S42.023A, S42.023B, S42.026A, S42.026B, S42.033A, S42.033B, S42.036A, S42.036B, S42.109A, S42.109B, S42.113A, S42.113B, S42.116A, S42.116B, S42.123A, S42.123B, S42.126A, S42.126B, S42.133A, S42.133B, S42.136A, S42.136B, S42.143A, S42.143B, S42.146A, S42.146B, S42.153A, S42.153B, S42.156A, S42.156B, S42.199A, S42.199B, S42.209A, S42.209B, S42.213A, S42.213B, S42.216A, S42.216B, S42.253A, S42.253B, S42.256A, S42.256B, S42.293A, S42.293B, S42.295A, S42.296A, S42.296B, S42.309A, S42.309B, S42.399A, S42.399B, S42.409A, S42.409B, S42.413A, S42.413B, S42.416A, S42.416B, S42.433A, S42.433A, S42.436A, S42.443A, S42.446A, S42.453A, S42.453B, S42.456A, S42.456B, S42.463A, S42.463B, S42.466A, S42.466B, S42.473A, S42.473B, S42.476A, S42.476B, S42.493A, S42.493B, S42.496A, S42.496B, S42.90XA, S42.90XB, S42.91XA, S42.91XB, S42.92XA, S42.92XB, S43.006A, S43.016A, S43.026A, S43.036A, S43.086A, S43.109A, S43.206A, S43.409A, S43.419A, S43.429A, S43.439A, S43.499A, S43.50XA, S43.80XA, S44.00XA, S44.10XA, S44.20XA, S44.30XA, S44.40XA, S44.50XA, S44.8X9A, S44.90XA, S46.019A, S46.119A, S46.819A, S46.919A, S46.929A, S47.9XXA, S48.019A, S48.029A, S48.119A, S48.129A, S48.911A, S48.912A, S48.919A, S48.921A, S48.922A, S48.929A, S49.80XA, S49.90XA, S50.00XA, S50.10XA, S51.009A, S51.029A, S51.809A, S51.829A, S52.009A, S52.009B, S52.009C, S52.011A, S52.012A, S52.019A, S52.023A, S52.023B, S52.023C, S52.026A, S52.026B, S52.026C</p> |
|--------------|-----------------------------------------------------------------------------------------------------------------------------------------------------------------------------------------------------------------------------------------------------------------------------------------------------------------------------------------------------------------------------------------------------------------------------------------------------------------------------------------------------------------------------------------------------------------------------------------------------------------------------------------------------------------------------------------------------------------------------------------------------------------------------------------------------------------------------------------------------------------------------------------------------------------------------------------------------------------------------------------------------------------------------------------------------------------------------------------------------------------------------------------------------------------------------------------------------------------------------------------------------------------------------------------------------------------------------------------------------------------------------------------------------------------------------------------------------------------------------------------------------------------------------------------------------------------------------------------------------------------------------------------------------------------------------------------------------------------------------------------------------------------------------------------------------------------------------------------------------------------------------------------------------------------------------------------------------------------------------------------------------------------------------------------------------------------------------------------------------------------------------------------------------------------------------------------------------------------------------------------------------------------------------------------------------------------------------------------------------------------------------------------------------------------------------------------------------------------------------------------------------------------------------------------------------------------------------------------------------------------------------------------------------------------------------------------------------------------------------------------------------------------------------------------------------------------------------------------------------------------------------------------------------------------------------------------------------------------------------------------------------------------------------------------------------------------------------------------------------------------------------------------------------------------------------------------------------------------------------------------------------------------------------------------------------------------------------------------------------------------------------------------------------------------------------------------------------------------------------------------------------------------------------------------------------------------------------------------------------------------------------------------------------------------------------------------------------------------------------------------------------------------------------------------------------------------------------------------------------------------------------------------------------------------------------------------------------------------------------------------------------------------------------------------------------------------------------------------------------------------------------------------------------------------------------------------------------------------------------------------------------------------------------------------------------------------------------------------------------------------------------------------------------------------------------------------------------------------------------------------------------------------------------------------------------------------------------------------------------------------------------------------------------------------------------------------------------------------------------------------------------------------------------------------------------------------------------------------------------------------------------------------------------------------------------------------------------------------------------------------------------------------------------------------------------------------------------------------------------------------------------------------------------------------------------------------------------------------------------------------------------------------------------------------------------------------------------------------------------------------------------------------------------------------------------------------------------------------------------------------------------------------------------------------------------------------------------------------------------------------------------------------------------------------------------------------------------------------------------------------------------------------------------------------------------------------------------------------------------------------------------------------------------------------------------------------------------------------------------------------------------------------------------------------------------------------------------------------------------------------------------------------------------------------------------------------------------------------------------------------------------------------------------------------------------------------------------------------------------------------------------------------------------------------------------------------------------------------------------------------------------------------------------------------------------------------------------------------------------------------------------------------------------------------------------------------------------------------------------------------------------------------------------------------------------------------------------------------------------------------------------------------------------------------------------------------------------------------------------------------------------------------------------------------------------------------------------------------------------------------------------------------------------------------------------------------------------------------------------------------------------------------------------------------------------------------------------------------------------------------------------------------------------------------------------------------------------------------------------------------------------------------------------------------------------------------------------------------------------------------------------------------------------------------------------------------------------------------------------------------------------------------------------------------------------------------------------------------------------------------------------------------------------------------------------------------------------------------------|

|                      |                                                                                                                                                                                                                                                                                                                                                                                                                                                                                                                                                                                                                                                                                                                                                                                                                                                                                                                                                                                                                                                                                                                                                                                                                                                                                                                                                                                                                                                                                                                                                                                                                                                                                                                                                                                                                                                                                                                                                                                                                                                                                                                                                                                                                                                                                                                                                                                                                                                                                                                                                                                                                                                                                                                                                                                                                                                                                                                                                                                                                                                                                                                                                                                                                                                                                                                                                                                                                                                                                                                                                                                                                                                                                                                                                                                                                                                                                                                                                                                                                                                                                                                                                                                                                                                                                                                                                                                                                                                                                                                                                                                                                                                                                                                                                                                                                                                                                                                                                                                                                                                                                                                                                                                                                                                                                                                                                                                                                                                                                                                                                                                                                                                                                                                                                                                                                                                                                                                                                                                                                                                                                                                                                                                                                                                                                                                                                                                                                                                                                                                                                                                                                                                                                                                                                                                                                                                                                                                                                                                                                                                                                                                                                                                                                                                                                                                                                                                                                                                                                                                                                                                                                                                                                                                                                                                                                                                                                                                                                                                                                                                                                                            |
|----------------------|------------------------------------------------------------------------------------------------------------------------------------------------------------------------------------------------------------------------------------------------------------------------------------------------------------------------------------------------------------------------------------------------------------------------------------------------------------------------------------------------------------------------------------------------------------------------------------------------------------------------------------------------------------------------------------------------------------------------------------------------------------------------------------------------------------------------------------------------------------------------------------------------------------------------------------------------------------------------------------------------------------------------------------------------------------------------------------------------------------------------------------------------------------------------------------------------------------------------------------------------------------------------------------------------------------------------------------------------------------------------------------------------------------------------------------------------------------------------------------------------------------------------------------------------------------------------------------------------------------------------------------------------------------------------------------------------------------------------------------------------------------------------------------------------------------------------------------------------------------------------------------------------------------------------------------------------------------------------------------------------------------------------------------------------------------------------------------------------------------------------------------------------------------------------------------------------------------------------------------------------------------------------------------------------------------------------------------------------------------------------------------------------------------------------------------------------------------------------------------------------------------------------------------------------------------------------------------------------------------------------------------------------------------------------------------------------------------------------------------------------------------------------------------------------------------------------------------------------------------------------------------------------------------------------------------------------------------------------------------------------------------------------------------------------------------------------------------------------------------------------------------------------------------------------------------------------------------------------------------------------------------------------------------------------------------------------------------------------------------------------------------------------------------------------------------------------------------------------------------------------------------------------------------------------------------------------------------------------------------------------------------------------------------------------------------------------------------------------------------------------------------------------------------------------------------------------------------------------------------------------------------------------------------------------------------------------------------------------------------------------------------------------------------------------------------------------------------------------------------------------------------------------------------------------------------------------------------------------------------------------------------------------------------------------------------------------------------------------------------------------------------------------------------------------------------------------------------------------------------------------------------------------------------------------------------------------------------------------------------------------------------------------------------------------------------------------------------------------------------------------------------------------------------------------------------------------------------------------------------------------------------------------------------------------------------------------------------------------------------------------------------------------------------------------------------------------------------------------------------------------------------------------------------------------------------------------------------------------------------------------------------------------------------------------------------------------------------------------------------------------------------------------------------------------------------------------------------------------------------------------------------------------------------------------------------------------------------------------------------------------------------------------------------------------------------------------------------------------------------------------------------------------------------------------------------------------------------------------------------------------------------------------------------------------------------------------------------------------------------------------------------------------------------------------------------------------------------------------------------------------------------------------------------------------------------------------------------------------------------------------------------------------------------------------------------------------------------------------------------------------------------------------------------------------------------------------------------------------------------------------------------------------------------------------------------------------------------------------------------------------------------------------------------------------------------------------------------------------------------------------------------------------------------------------------------------------------------------------------------------------------------------------------------------------------------------------------------------------------------------------------------------------------------------------------------------------------------------------------------------------------------------------------------------------------------------------------------------------------------------------------------------------------------------------------------------------------------------------------------------------------------------------------------------------------------------------------------------------------------------------------------------------------------------------------------------------------------------------------------------------------------------------------------------------------------------------------------------------------------------------------------------------------------------------------------------------------------------------------------------------------------------------------------------------------------------------------------------------------------------------------------------------------------------------------------------------------------------------------------|
| Other injury (cont.) | <p>S52.043A, S52.043B, S52.043C, S52.046A, S52.046B, S52.046C, S52.099A, S52.099B, S52.099C, S52.109A, S52.109B, S52.109C, S52.111A, S52.112A, S52.119A, S52.123A, S52.123B, S52.123C, S52.126A, S52.126B, S52.126C, S52.133A, S52.133B, S52.133C, S52.136A, S52.136B, S52.136C, S52.189A, S52.189B, S52.189C, S52.209A, S52.209B, S52.209C, S52.279A, S52.279B, S52.279C, S52.309A, S52.309B, S52.309C, S52.509A, S52.509B, S52.509C, S52.521A, S52.522A, S52.529A, S52.539A, S52.539B, S52.539C, S52.549A, S52.609A, S52.609B, S52.609C, S52.621A, S52.622A, S52.629A, S52.90XA, S52.90XB, S52.90XC, S52.91XA, S52.91XB, S52.92XA, S52.92XB, S53.006A, S53.016A, S53.026A, S53.033A, S53.096A, S53.106A, S53.116A, S53.136A, S53.146A, S53.196A, S53.409A, S53.419A, S53.429A, S53.439A, S53.449A, S53.499A, S54.00XA, S54.10XA, S54.20XA, S54.30XA, S56.919A, S56.929A, S57.00XA, S57.80XA, S58.019A, S58.029A, S58.119A, S58.129A, S58.919A, S58.929A, S59.109A, S59.809A, S59.819A, S59.909A, S59.919A, S60.00XA, S60.019A, S60.10XA, S60.219A, S60.229A, S61.009A, S61.109A, S61.209A, S61.229A, S61.409A, S61.429A, S61.509A, S61.529A, S62.009A, S62.009B, S62.109A, S62.109B, S62.113A, S62.113B, S62.116A, S62.116B, S62.123A, S62.123B, S62.126A, S62.126B, S62.133A, S62.133B, S62.136A, S62.136B, S62.143A, S62.143B, S62.146A, S62.146B, S62.153A, S62.153B, S62.156A, S62.156B, S62.163A, S62.163B, S62.166A, S62.166B, S62.173A, S62.173B, S62.176A, S62.176B, S62.183A, S62.183B, S62.186A, S62.186B, S62.233A, S62.233B, S62.236A, S62.236B, S62.309A, S62.309B, S62.319A, S62.319B, S62.329A, S62.329B, S62.339A, S62.339B, S62.349A, S62.349B, S62.359A, S62.359B, S62.369A, S62.369B, S62.399A, S62.399B, S62.509A, S62.509B, S62.513A, S62.513B, S62.516A, S62.516B, S62.523A, S62.523B, S62.526A, S62.526B, S62.609A, S62.609B, S62.619B, S62.629A, S62.629B, S62.639A, S62.639B, S62.649A, S62.649B, S62.659A, S62.659B, S62.669A, S62.669B, S62.90XA, S62.90XB, S63.006A, S82.856C, S82.899A, S82.899B, S82.899C, S82.90XA, S82.90XB, S82.91XA, S82.91XB, S82.92XA, S82.92XB, S83.006A, S83.106A, S83.116A, S83.126A, S83.136A, S83.146A, S83.196A, S83.219A, S83.249A, S83.289A, S83.30XA, S83.419A, S83.429A, S83.509A, S83.60XA, S83.8X9A, S83.90XA, S84.00XA, S84.10XA, S84.20XA, S84.809A, S84.90XA, S86.019A, S86.819A, S86.919A, S86.929A, S87.00XA, S87.80XA, S88.019A, S88.029A, S88.119A, S88.129A, S88.911A, S88.912A, S88.919A, S88.929A, S89.80XA, S89.90XA, S90.00XA, S90.119A, S90.129A, S90.229A, S90.30XA, S91.009A, S91.029A, S91.109A, S91.129A, S91.209A, S91.309A, S91.329A, S92.009A, S92.009B, S92.109A, S92.109B, S92.201A, S92.201B, S92.202A, S92.202B, S92.209A, S92.209B, S92.213A, S92.213B, S92.216A, S92.216B, S92.223A, S92.223B, S92.226A, S92.226B, S92.233A, S92.233B, S92.236A, S92.236B, S92.243A, S92.243B, S92.246A, S92.246B, S92.253A, S92.253B, S92.256A, S92.256B, S92.301A, S92.301B, S92.302A, S92.302B, S92.309A, S92.309B, S92.403A, S92.403B, S92.406A, S92.406B, S92.503A, S92.503B, S92.506A, S92.506B, S92.819A, S92.819B, S92.909A, S92.909B, S93.06XA, S93.106A, S93.119A, S93.129A, S93.306A, S93.316A, S93.326A, S93.336A, S93.409A, S93.419A, S93.429A, S93.439A, S93.499A, S93.519A, S93.529A, S93.609A, S93.629A, S93.699A, S94.30XA, S94.8X9A, S94.90XA, S96.919A, S96.929A, S97.00XA, S97.109A, S97.80XA, S98.019A, S98.029A, S98.119A, S98.129A, S98.139A, S98.149A, S98.199A, S98.219A, S98.229A, S98.319A, S98.329A, S98.911A, S98.912A, S98.919A, S98.921A, S98.922A, S98.929A, S99.009A, S99.009B, S99.019A, S99.019B, S99.029A, S99.029B, S99.039A, S99.039B, S99.049A, S99.049B, S99.099A, S99.099B, S99.109A, S99.109B, S99.119A, S99.119B, S99.129A, S99.129B, S99.139A, S99.139B, S99.149A, S99.149B, S99.199A, S99.199B, S99.819A, S99.919A, T07.XXXA, T14.8XXA, T14.90XA, T15.00XA, T15.01XA, T15.02XA, T15.10XA, T15.11XA, T15.12XA, T15.80XA, T15.81XA, T15.82XA, T15.90XA, T15.91XA, T15.92XA, T16.1XXA, T16.2XXA, T16.9XXA, T17.0XXA, T17.1XXA, T17.200A, T17.208A, T17.210A, T17.218A, T17.220A, T17.228A, T17.290A, T17.298A, T17.300A, T17.308A, T17.310A, T17.318A, T17.320A, T17.328A, T17.390A, T17.398A, T17.400A, T17.408A, T17.410A, T17.418A, T17.420A, T17.428A, T17.490A, T17.498A, T17.500A, T17.508A, T17.510A, T17.518A, T17.528A, T17.590A, T17.598A, T17.800A, T17.808A, T17.810A, T17.818A, T17.820A, T17.828A, T17.890A, T17.898A, T17.900A, T17.908A, T17.910A, T17.918A, T17.920A, T17.928A, T17.990A, T17.998A, T18.0XXA, T18.100A, T18.108A, T18.110A, T18.118A, T18.120A, T18.128A, T18.190A, T18.198A, T18.2XXA, T18.3XXA, T18.4XXA, T18.5XXA, T18.8XXA, T18.9XXA, T19.0XXA, T19.1XXA, T19.2XXA, T19.3XXA, T19.4XXA, T19.8XXA, T19.9XXA, T20.00XA, T20.019A, T20.02XA, T20.03XA, T20.04XA, T20.05XA, T20.06XA, T20.07XA, T20.09XA, T20.10XA, T20.119A, T20.12XA, T20.13XA, T20.14XA, T20.15XA, T20.16XA, T20.17XA, T20.19XA, T20.20XA, T20.219A, T20.22XA, T20.23XA, T20.24XA, T20.25XA, T20.26XA, T20.27XA, T20.29XA, T20.30XA, T20.319A, T20.32XA, T20.33XA, T20.34XA, T20.35XA, T20.36XA, T20.37XA, T20.39XA, T20.40XA, T20.419A, T20.42XA, T20.43XA, T20.44XA, T20.45XA, T20.46XA, T20.47XA, T20.49XA, T20.50XA, T20.519A, T20.52XA, T20.53XA, T20.54XA, T20.55XA, T20.56XA, T20.57XA, T20.59XA, T20.60XA, T20.619A, T20.62XA, T20.63XA, T20.64XA, T20.65XA, T20.66XA, T20.67XA, T20.69XA, T20.70XA, T20.719A, T20.72XA, T20.73XA, T20.74XA, T20.75XA, T20.76XA, T20.77XA, T20.79XA, T21.00XA, T21.01XA, T21.02XA, T21.03XA, T21.06XA, T21.07XA, T21.09XA, T21.10XA, T21.11XA, T21.12XA, T21.13XA, T21.16XA, T21.17XA, T21.19XA, T21.20XA, T21.21XA, T21.22XA, T21.23XA, T21.26XA, T21.27XA, T21.29XA, T21.30XA, T21.31XA, T21.32XA, T21.33XA, T21.36XA, T21.37XA, T21.39XA, T21.40XA, T21.41XA, T21.42XA, T21.43XA, T21.46XA, T21.47XA, T21.49XA, T21.50XA, T21.51XA, T21.52XA, T21.53XA, T21.56XA, T21.57XA, T21.59XA, T21.60XA, T21.61XA, T21.62XA, T21.63XA, T21.66XA, T21.67XA, T21.69XA, T21.70XA, T21.71XA, T21.72XA, T21.73XA, T21.76XA, T21.77XA, T21.79XA, T22.00XA, T22.019A, T22.029A, T22.039A, T22.049A, T22.059A, T22.069A, T22.099A, T22.10XA, T22.119A, T22.129A, T22.139A, T22.149A, T22.159A, T22.169A, T22.199A, T22.20XA, T22.219A, T22.229A, T22.239A, T22.249A, T22.259A, T22.269A, T22.299A, T22.30XA, T22.319A, T22.329A, T22.339A, T22.349A, T22.359A, T22.369A, T22.399A, T22.40XA, T22.419A, T22.429A, T22.439A, T22.449A, T22.459A, T22.469A, T22.499A, T22.50XA, T22.519A, T22.529A, T22.539A, T22.549A, T22.559A, T22.569A, T22.599A, T22.60XA, T22.619A, T22.629A, T22.639A, T22.649A, T22.659A, T22.669A, T22.699A, T22.70XA, T22.719A, T22.729A, T22.739A, T22.749A, T22.759A, T22.769A, T22.799A, T23.009A, T23.019A, T23.029A, T23.039A, T23.049A, T23.059A, T23.069A, T23.079A, T23.099A, T23.109A, T23.119A, T23.129A, T23.139A, T23.149A, T23.159A, T23.169A, T23.179A, T23.199A, T23.209A, T23.219A, T23.229A, T23.239A, T23.249A, T23.259A, T23.269A, T23.279A, T23.299A, T23.309A, T23.319A, T23.329A, T23.339A, T23.349A, T23.359A, T23.369A, T23.379A, T23.399A, T23.409A, T23.419A, T23.429A, T23.439A, T23.449A, T23.459A, T23.469A, T23.479A, T23.499A, T23.509A, T23.519A, T23.529A, T23.539A, T23.549A, T23.559A, T23.569A, T23.579A, T23.599A, T23.609A, T23.619A, T23.629A, T23.639A, T23.649A, T23.659A, T23.669A, T23.679A, T23.699A, T23.709A, T23.719A, T23.729A, T23.739A, T23.749A, T23.759A, T23.769A, T23.779A, T23.799A, T24.009A, T24.019A, T24.029A, T24.039A, T24.099A, T24.109A, T24.119A, T24.129A, T24.139A, T24.199A, T24.209A, T24.219A, T24.229A, T24.239A, T24.299A, T24.309A, T24.319A, T24.329A, T24.339A, T24.399A, T24.409A, T24.419A, T24.429A, T24.439A, T24.499A, T24.509A, T24.519A, T24.529A, T24.539A, T24.599A, T24.609A, T24.619A, T24.629A, T24.639A, T24.699A, T24.709A, T24.719A, T24.729A, T24.739A, T24.799A, T25.019A, T25.029A, T25.039A, T25.099A, T25.119A, T25.129A, T25.139A, T25.199A, T25.219A, T25.229A, T25.239A, T25.299A, T25.319A, T25.329A, T25.339A, T25.399A,</p> |
|----------------------|------------------------------------------------------------------------------------------------------------------------------------------------------------------------------------------------------------------------------------------------------------------------------------------------------------------------------------------------------------------------------------------------------------------------------------------------------------------------------------------------------------------------------------------------------------------------------------------------------------------------------------------------------------------------------------------------------------------------------------------------------------------------------------------------------------------------------------------------------------------------------------------------------------------------------------------------------------------------------------------------------------------------------------------------------------------------------------------------------------------------------------------------------------------------------------------------------------------------------------------------------------------------------------------------------------------------------------------------------------------------------------------------------------------------------------------------------------------------------------------------------------------------------------------------------------------------------------------------------------------------------------------------------------------------------------------------------------------------------------------------------------------------------------------------------------------------------------------------------------------------------------------------------------------------------------------------------------------------------------------------------------------------------------------------------------------------------------------------------------------------------------------------------------------------------------------------------------------------------------------------------------------------------------------------------------------------------------------------------------------------------------------------------------------------------------------------------------------------------------------------------------------------------------------------------------------------------------------------------------------------------------------------------------------------------------------------------------------------------------------------------------------------------------------------------------------------------------------------------------------------------------------------------------------------------------------------------------------------------------------------------------------------------------------------------------------------------------------------------------------------------------------------------------------------------------------------------------------------------------------------------------------------------------------------------------------------------------------------------------------------------------------------------------------------------------------------------------------------------------------------------------------------------------------------------------------------------------------------------------------------------------------------------------------------------------------------------------------------------------------------------------------------------------------------------------------------------------------------------------------------------------------------------------------------------------------------------------------------------------------------------------------------------------------------------------------------------------------------------------------------------------------------------------------------------------------------------------------------------------------------------------------------------------------------------------------------------------------------------------------------------------------------------------------------------------------------------------------------------------------------------------------------------------------------------------------------------------------------------------------------------------------------------------------------------------------------------------------------------------------------------------------------------------------------------------------------------------------------------------------------------------------------------------------------------------------------------------------------------------------------------------------------------------------------------------------------------------------------------------------------------------------------------------------------------------------------------------------------------------------------------------------------------------------------------------------------------------------------------------------------------------------------------------------------------------------------------------------------------------------------------------------------------------------------------------------------------------------------------------------------------------------------------------------------------------------------------------------------------------------------------------------------------------------------------------------------------------------------------------------------------------------------------------------------------------------------------------------------------------------------------------------------------------------------------------------------------------------------------------------------------------------------------------------------------------------------------------------------------------------------------------------------------------------------------------------------------------------------------------------------------------------------------------------------------------------------------------------------------------------------------------------------------------------------------------------------------------------------------------------------------------------------------------------------------------------------------------------------------------------------------------------------------------------------------------------------------------------------------------------------------------------------------------------------------------------------------------------------------------------------------------------------------------------------------------------------------------------------------------------------------------------------------------------------------------------------------------------------------------------------------------------------------------------------------------------------------------------------------------------------------------------------------------------------------------------------------------------------------------------------------------------------------------------------------------------------------------------------------------------------------------------------------------------------------------------------------------------------------------------------------------------------------------------------------------------------------------------------------------------------------------------------------------------------------------------------------------------------------------------------------------------------------------------------------------------------------------------------------------|



|                                                 |                                                                                                                                                                                                                                                                                                                                                                                                                                                                                                                                                                                                                                                                                                                                                                                                                                                                                                                                                                                                                                                                                                                                                                                                                                                                                                                                                                                                                                                                                                                                                                                                                                                                                       |
|-------------------------------------------------|---------------------------------------------------------------------------------------------------------------------------------------------------------------------------------------------------------------------------------------------------------------------------------------------------------------------------------------------------------------------------------------------------------------------------------------------------------------------------------------------------------------------------------------------------------------------------------------------------------------------------------------------------------------------------------------------------------------------------------------------------------------------------------------------------------------------------------------------------------------------------------------------------------------------------------------------------------------------------------------------------------------------------------------------------------------------------------------------------------------------------------------------------------------------------------------------------------------------------------------------------------------------------------------------------------------------------------------------------------------------------------------------------------------------------------------------------------------------------------------------------------------------------------------------------------------------------------------------------------------------------------------------------------------------------------------|
| Other injury (cont.)                            | T25.419A, T25.429A, T25.439A, T25.499A, T25.519A, T25.529A, T25.539A, T25.599A, T25.619A, T25.629A, T25.639A, T25.699A, T25.719A, T25.729A, T25.739A, T25.799A, T26.00XA, T26.10XA, T26.20XA, T26.21XA, T26.22XA, T26.40XA, T26.41XA, T26.42XA, T26.50XA, T26.60XA, T26.70XA, T26.90XA, T27.1XXA, T27.5XXA, T28.0XXA, T28.1XXA, T28.2XXA, T28.3XXA, T28.40XA, T28.49XA, T28.5XXA, T28.6XXA, T28.7XXA, T28.8XXA, T28.90XA, T28.99XA, T30.0, T30.4, T31.0, T31.10, T31.11, T31.20, T31.21, T31.22, T31.30, T31.31, T31.32, T31.33, T31.40, T31.41, T31.42, T31.43, T31.44, T31.50, T31.51, T31.52, T31.53, T31.54, T31.55, T31.60, T31.61, T31.62, T31.63, T31.64, T31.65, T31.66, T31.70, T31.71, T31.72, T31.73, T31.74, T31.75, T31.76, T31.77, T31.80, T31.81, T31.82, T31.83, T31.84, T31.85, T31.86, T31.87, T31.88, T31.90, T31.91, T31.92, T31.93, T31.94, T31.95, T31.96, T31.97, T31.98, T31.99, T32.0, T32.10, T32.11, T32.20, T32.21, T32.22, T32.30, T32.31, T32.32, T32.33, T32.40, T32.41, T32.42, T32.43, T32.44, T32.50, T32.51, T32.52, T32.53, T32.54, T32.55, T32.60, T32.61, T32.62, T32.63, T32.64, T32.65, T32.66, T32.70, T32.71, T32.72, T32.73, T32.74, T32.75, T32.76, T32.77, T32.80, T32.81, T32.82, T32.83, T32.84, T32.85, T32.86, T32.87, T32.88, T32.90, T32.91, T32.92, T32.93, T32.94, T32.95, T32.96, T32.97, T32.98, T32.99, T79.A0XA, T79.A19A, T79.A29A, T79.A3XA, T79.A9XA, T87.40, L10.0, L10.1, L10.2, L10.4, L10.9, L52, L73.2, L89.009, L89.119, L89.129, L89.139, L89.149, L89.159, L89.209, L89.309, L89.509, L89.609, L89.819, L89.899, L89.90, L97.109, L97.209, L97.309, L97.409, L97.509, L97.809, L97.909, L98.419, L98.429, L98.499 |
| Pain in limb                                    | M79.609                                                                                                                                                                                                                                                                                                                                                                                                                                                                                                                                                                                                                                                                                                                                                                                                                                                                                                                                                                                                                                                                                                                                                                                                                                                                                                                                                                                                                                                                                                                                                                                                                                                                               |
| Pain in thoracic spine                          | M54.6                                                                                                                                                                                                                                                                                                                                                                                                                                                                                                                                                                                                                                                                                                                                                                                                                                                                                                                                                                                                                                                                                                                                                                                                                                                                                                                                                                                                                                                                                                                                                                                                                                                                                 |
| Peripheral nerve disorder                       | E10.42, E11.42, G54.0, G54.1, G54.2, G54.3, G54.4, G54.5, G54.6, G54.7, G54.8, G54.9, G56.00, G56.10, G56.20, G56.30, G56.40, G56.80, G56.90, G57.00, G57.10, G57.20, G57.30, G57.40, G57.50, G57.60, G57.70, G57.80, G57.90, G58.7, G58.9, G60.0, G60.3, G60.8, G60.9, G61.81, G61.82, G61.89, G61.9, G62.1, G62.2, G62.81, G63, M54.10, M79.2, G50.0, G50.1, G50.8, G50.9                                                                                                                                                                                                                                                                                                                                                                                                                                                                                                                                                                                                                                                                                                                                                                                                                                                                                                                                                                                                                                                                                                                                                                                                                                                                                                           |
| Postlaminectomy syndrome or failed back surgery | M96.1                                                                                                                                                                                                                                                                                                                                                                                                                                                                                                                                                                                                                                                                                                                                                                                                                                                                                                                                                                                                                                                                                                                                                                                                                                                                                                                                                                                                                                                                                                                                                                                                                                                                                 |
| Sciatica                                        | M54.30                                                                                                                                                                                                                                                                                                                                                                                                                                                                                                                                                                                                                                                                                                                                                                                                                                                                                                                                                                                                                                                                                                                                                                                                                                                                                                                                                                                                                                                                                                                                                                                                                                                                                |
| Thoracic or lumbosacralneuritis or radiculitis  | M54.14, M54.15, M54.16, M54.17                                                                                                                                                                                                                                                                                                                                                                                                                                                                                                                                                                                                                                                                                                                                                                                                                                                                                                                                                                                                                                                                                                                                                                                                                                                                                                                                                                                                                                                                                                                                                                                                                                                        |
